# Supplementary material
Source: publisher site journal article supplement (https://www.spandidos-publications.com/5873/downloadSupplementary)

Figure S1. Effects of LNX on TNF- $\alpha$ -induced COX-2 mRNA expression level in 3T3-L1 preadipocytes. (A) 3T3-L1 preadipocytes were treated with or without TNF- $\alpha$  (10 ng/ml) in the presence or absence of LNX at the designated concentrations for 4 h. After the aforementioned treatment, total RNA was extracted and analyzed for COX-2 using reverse transcription PCR analysis. (B) The densitometric analysis of panel A. LNX, lignan-enriched nutmeg extract; COX-2, cyclooxygenase-2.

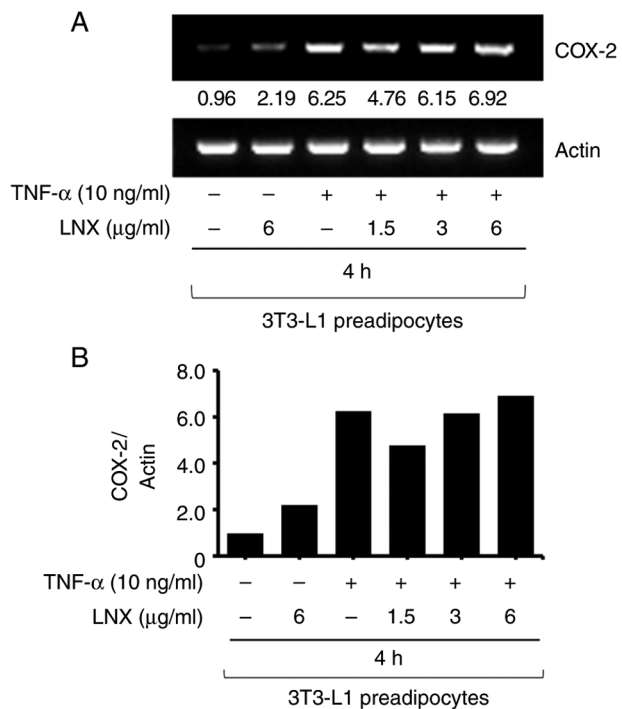

Supplement: Supplementary file 1 [file downloadSupplementary]
